# Supplementary material for: Taxonomic review of the late Cenozoic megapodes (Galliformes: Megapodiidae) of Australia
Source: PubMed Central journal article supplement (PMC5493918; doi:10.1098/rsos.170233), 2017-06-14
Supplement: rsos170233supp3.pdf [file rsos170233supp3.pdf]

### Supplementary Figure 1

Type material of *Garrdimalga mcnamarai* sp. nov. compared with other extinct species

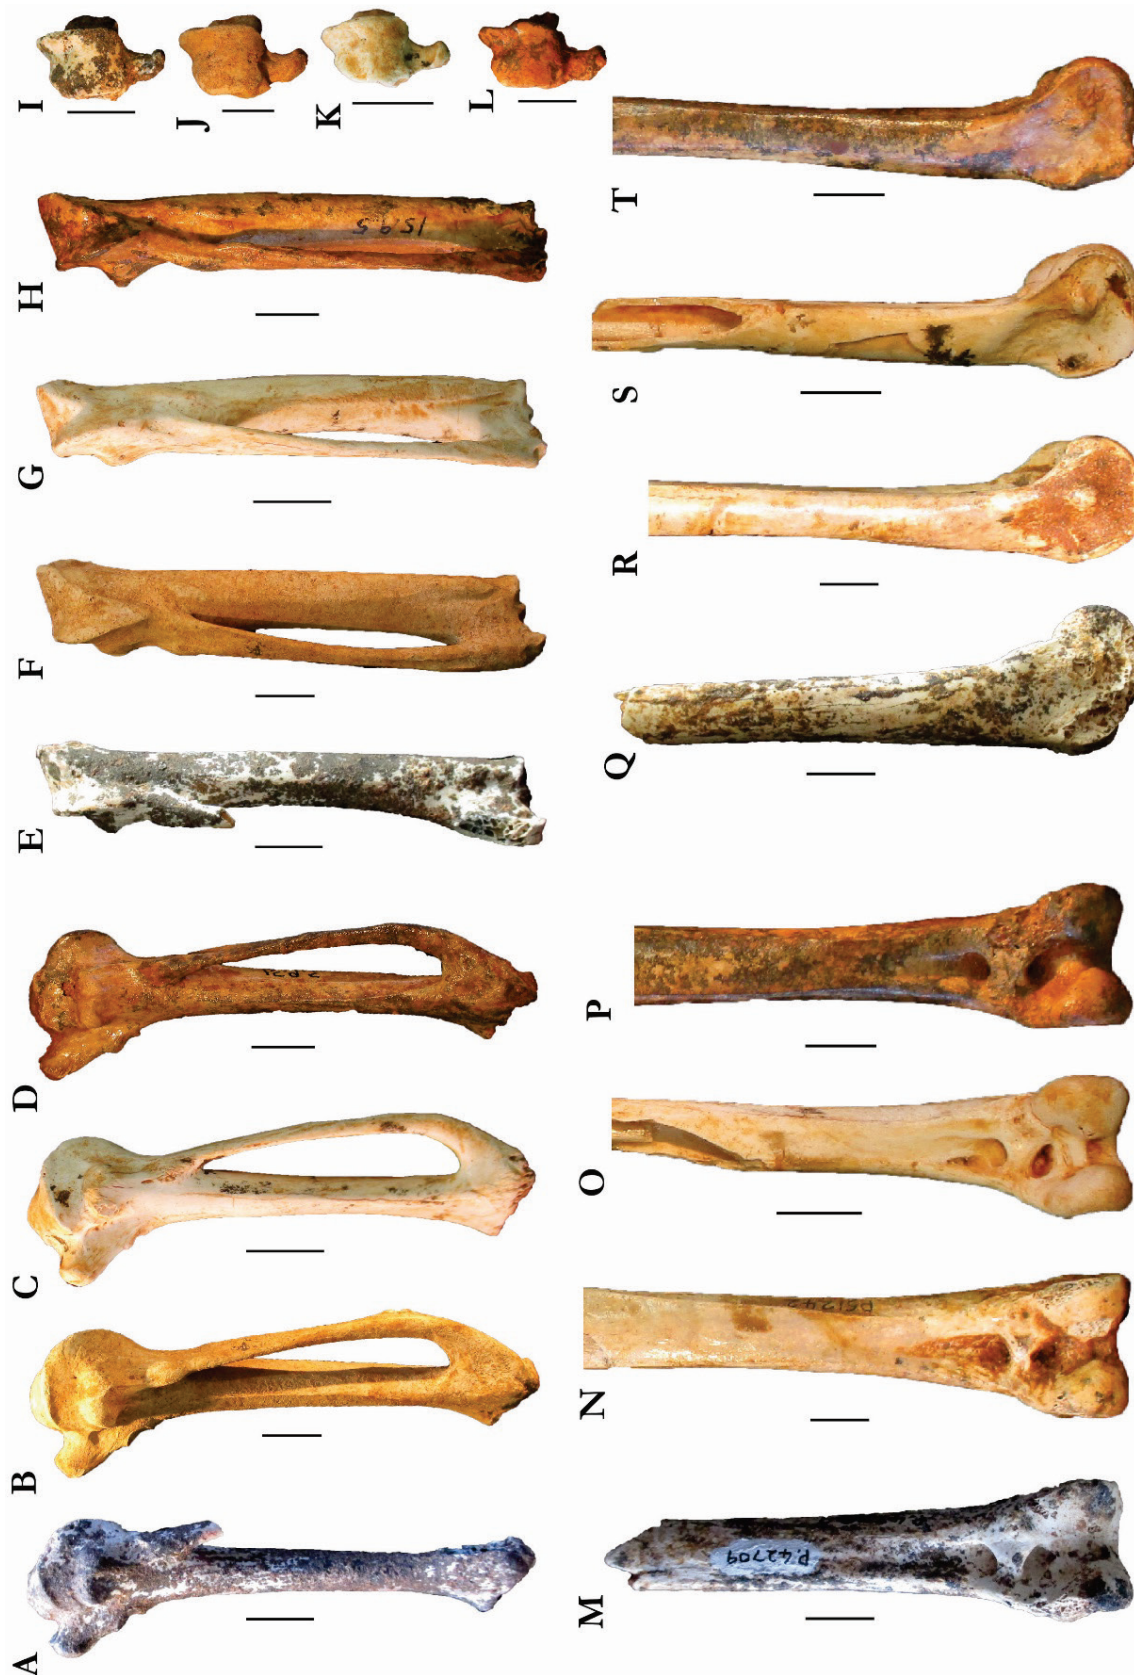

**Supp. Figure 1:** *Garrdimalga mcnamarai* carpometacarpus, SAM P42711, holotype (A, E, I) and tibiotarsus, SAM P42709, paratype (M, Q). Comparisons with *Latagallina naracoortensis* (B, F, J, N, R), *Latagallina olsoni* (C, G, K, O, S) and *Progura campestris* (D, H, L, P, T).
